# Supplementary material for: Equilibration times in viscous and viscoelastic aerosol particles
Source: Royal Society of Chemistry journal article supplement (doi:10.1039/d2ea00065b), 2022-01-01
Supplement: d2ea00065b1.zip [file d2ea00065b1.zip]

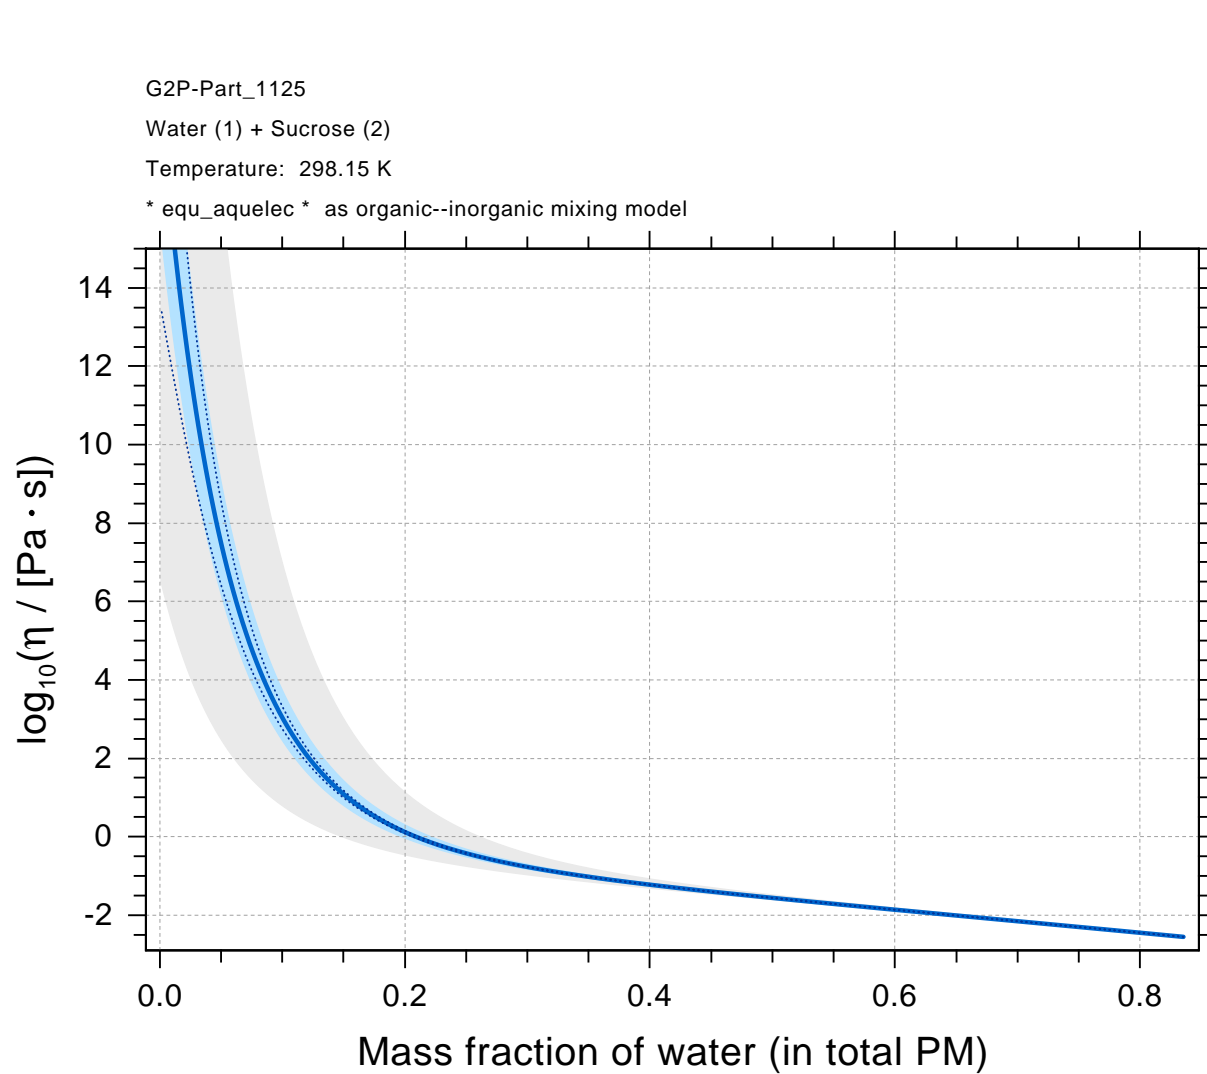

left y-axis:

- AIOMFAC  $\log_{10}(\eta_\alpha)$  range from  $\pm 20\%$  in  $T_g(\text{org})$
- AIOMFAC  $\log_{10}(\eta_\alpha)$  range from  $\pm 5\%$  in  $T_g(\text{org})$
- AIOMFAC pred.  $\log_{10}(\eta_\alpha)$  ; pure comp. method: 11
- AIOMFAC  $\log_{10}(\eta_\alpha)$  sensitivity (+)
- AIOMFAC  $\log_{10}(\eta_\alpha)$  sensitivity (-)

| Comp.   | Tg (K)           | Fragility |
|---------|------------------|-----------|
| Sucrose | 341.00 +/- 17.05 | 30.0      |
