# Supplementary material for: Equilibration times in viscous and viscoelastic aerosol particles
Source: Royal Society of Chemistry journal article supplement (doi:10.1039/d2ea00065b), 2022-01-01
Supplement: d2ea00065b2.pdf [file d2ea00065b2.pdf]

# Supplemental Material: Equilibration times in viscous and viscoelastic aerosol particles

September 6, 2022

Thomas C. Preston<sup>\*1,2</sup> and Andreas Zuend<sup>1</sup>

1. Department of Atmospheric and Oceanic Sciences, McGill University, Montreal, Quebec, Canada
2. Department of Chemistry, McGill University, Montreal, Quebec, Canada

\* Thomas C. Preston

e-mail: [thomas.preston@mcgill.ca](mailto:thomas.preston@mcgill.ca)

# 1 Contents of Supplemental Material

In this document, we provide parameters for aqueous sucrose calculations (Section 2), parameters for aqueous oxidized  $\alpha$ -pinene calculations (Section 3), the modelled global relative humidity (Section 4), and the modelled global relative temperature (Section 5). Provided as separate files are the output of from AIOMFAC-VISC calculations for aqueous sucrose and aqueous oxidized  $\alpha$ -pinene.

## 2 Aqueous sucrose

### 2.1 Diffusivity

For aqueous sucrose, the binary (Fickian) diffusivity from Zobrist et al. was used in all calculations.<sup>1</sup> The activity- and temperature-dependent diffusivity,  $D_w(a_w, T)$ , is

$$\log_{10} D_w(a_w, T) = - \left( A(a_w) + \frac{B(a_w)}{T - T_0(a_w)} \right), \quad (\text{S1})$$

where  $T$  is the temperature,  $a_w$  is the activity of water, and the three parameters  $A$ ,  $B$ , and  $T_0$ , are

$$A(a_w) = 7 + 0.175(1 - 46.46(1 - a_w)), \quad (\text{S2})$$

$$B(a_w) = 262.867(1 + 10.53(1 - a_w) - 0.3(1 - a_w)^2), \quad (\text{S3})$$

$$T_0(a_w) = 127.9(1 + 0.4514(1 - a_w) - 0.5(1 - a_w)^{1.7}). \quad (\text{S4})$$

### 2.2 Activity

The parameterization for  $a_w$  from Zobrist et al. was used here.<sup>1</sup> It is

$$a_w(T, w_s) = \frac{1 + aw_s}{1 + bw_s + cw_s^2} + (T - T^\theta)(dw_s + ew_s^2 + fw_s^3 + gw_s^4), \quad (\text{S5})$$

where  $w_s$  is mass fraction of sucrose in solution,  $T^\theta = 298.15$  K and  $a$  to  $g$  are fit parameters:  $a = -1$ ,  $b = -0.99721$ ,  $c = 0.13599$ ,  $d = 0.001688$ ,  $e = -0.005151$ ,  $f = 0.009607$ , and  $g = -0.006142$ .

## 2.3 Density

The density was calculated using the partial specific volumes  $0.001 \text{ m}^3/\text{kg}$  for water and  $0.000632 \text{ m}^3/\text{kg}$  for sucrose.

## 2.4 Young's Modulus

Measured values of the elastic modulus for sucrose crystals at room temperature range from 32.3 to  $38.2 \pm 0.4$  GPa.<sup>2,3</sup> We used 33 GPa in all calculations, which is representative of these reported measurements.

## 2.5 Viscosity

AIOMFAC-VISC was used to calculate the activity- and temperature-dependent viscosity of aqueous sucrose. Datasets were generated in steps of 10 K from 200 to 310 K. This set of output is provided as separate files in the supplementary material. Two-dimensional interpolation of this output was used for all activity- and temperature-dependent viscosity calculations.

# 3 Aqueous oxidized $\alpha$ -pinene

## 3.1 Diffusivity (Lienhard et al. parameterization)

The binary (Fickian) diffusivity for aqueous oxidized  $\alpha$ -pinene was calculated using functions and parameters in Lienhard et al.<sup>4</sup> and additional functions provided by the authors of that

work. The diffusivity is

$$D_w(a_w, T) = D_w(0, T)^{1-x_w\alpha} D_w(1, T)^{x_w\alpha}, \quad (\text{S6})$$

where  $x_w$  is the mole fraction of water,

$$\ln \alpha = (1-x_w)^2 [A(T) + 3B(T) - 4(1-x_w)B(T)], \quad (\text{S7})$$

$$A(T) = \begin{cases} a_1 + a_2 T, & T \leq T_a \\ a_1 + a_2 T_a, & T > T_a, \end{cases} \quad (\text{S8})$$

$$a_1 = -18.31, \quad a_2 = 0.063 \text{ K}^{-1}, \quad T_a = 273 \text{ K},$$

$$B(T) = \begin{cases} b_1 + b_2 T, & T \leq T_b \\ b_1 + b_2 T_b, & T > T_b, \end{cases} \quad (\text{S9})$$

$$b_1 = -10.65, \quad b_2 = 0.039 \text{ K}^{-1}, \quad T_b = 273 \text{ K},$$

$$D_w(1, T) = D_0 \exp[-E_{\text{act},w}/(T - T_{0,w})], \quad (\text{S10})$$

$$D_0 = 0.00306 \text{ cm}^2/\text{s}, \quad E_{\text{act},w} = 892 \text{ K}, \quad T_{0,w} = 118 \text{ K},$$

$$D_w(0, T) = \exp(\zeta_A), \quad (\text{S11})$$

$$\zeta_A = \zeta_A^\circ - \frac{E_{\text{act}}}{RT} \quad (\text{S12})$$

$$E_{\text{act}} = 65.5 \text{ kJ/mol}, \quad R = 8.3145 \text{ J/(mol K)},$$

$$\zeta_A^\circ = \ln[D_w(0, T_g)/(\text{cm}^2 \text{ s}^{-1})] + \frac{E_{\text{act}}}{RT_g}, \quad (\text{S13})$$

$$T_g = 270 \text{ K}, \text{ and } \ln[D_w(0, T_g)/(\text{cm}^2 \text{ s}^{-1})] = -26.60.$$

Additionally, to convert between water activity, mass fraction, and mole fraction we use a molar mass of 150 g/mol for oxidized  $\alpha$ -pinene and the function

$$a_w = \frac{(1-w_s)^{0.49099}}{1 - 0.21245w_s^2 - 0.35w_s}, \quad (\text{S14})$$

where  $w_s$  is the mass fraction of the oxidized  $\alpha$ -pinene. Note that this activity function is only used for calculations involving Eq. S6. A different activity function (Eq. S16) is used in all other calculations involving the activity.

### 3.2 Diffusivity (fit to Price et al. measurements)

The measurements from Price et al.<sup>5</sup> were fitted using a quadratic polynomial. The best-fit was

$$\log_{10}D_w(a_w) = -13.08 + 0.9280a_w + 1.717a_w^2. \quad (\text{S15})$$

### 3.3 Activity

For calculations involving activity, mass fraction, and mole fraction not connected to Eq. S6, the function

$$w_s = \left(1 + \frac{0.02202a_w}{1 - a_w}\right)^{-3}, \quad (\text{S16})$$

was used. Although Eq. S16 is different than Eq. A9 in Ref. 4, it exactly reproduces the red curve in Fig. A4b of that paper.

### 3.4 Density

The density was calculated using the partial specific volumes 0.001 m<sup>3</sup>/kg for water and 0.000716 m<sup>3</sup>/kg for oxidized  $\alpha$ -pinene. Although these parameters have no temperature-dependence, the resulting density will still closely match Eq. A10 in Ref. 4 for any temperature of interest in the current work (i.e. 200 to 310 K).

### 3.5 Viscosity

AIOMFAC-VISC was used to calculate the activity- and temperature-dependent viscosity of aqueous oxidized  $\alpha$ -pinene, where the oxidized  $\alpha$ -pinene was characterized with a system of 15 SOA surrogate components. Datasets were generated in steps of 10 K from 200 to 310 K. This set of output is provided as separate files in the supplementary material. Two-dimensional interpolation of this output was used for all activity- and temperature-dependent viscosity calculations.

## 4 Global relative humidity

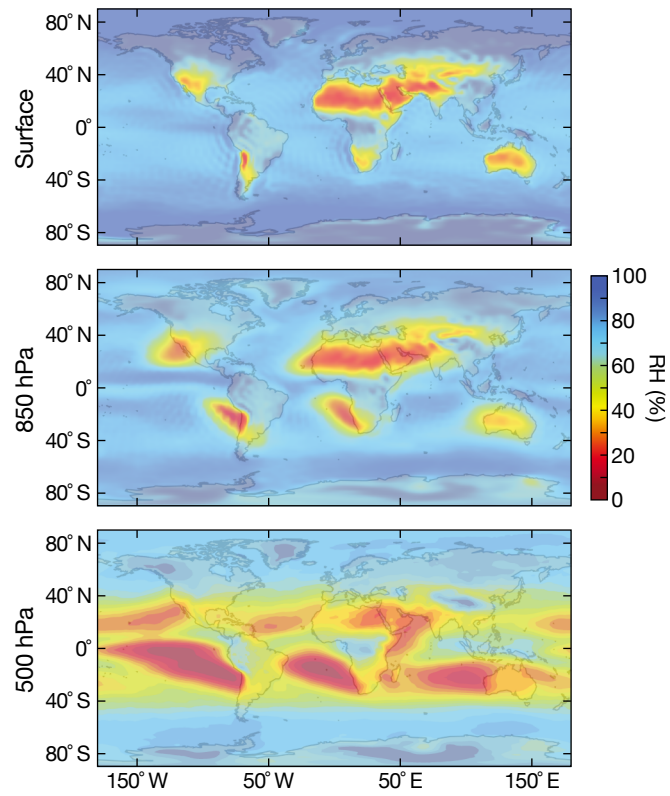

Figure S1: Relative humidity (RH) from the global chemistry climate model EMAC<sup>6</sup> that was used in calculations in the main text. The RH shown here is identical to that used in Ref. 7.

## 5 Global temperature

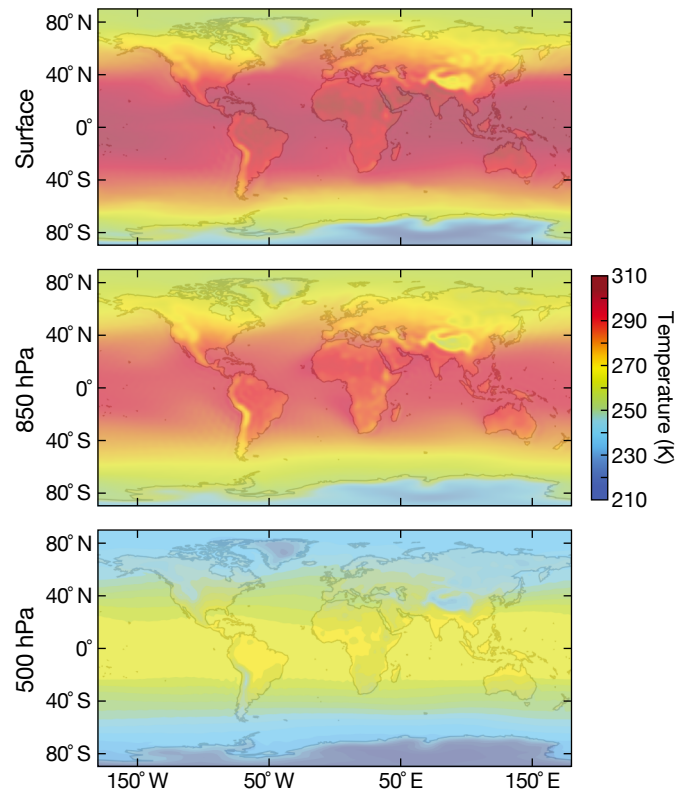

Figure S2: Temperature from the global chemistry climate model EMAC<sup>6</sup> that was used in calculations in the main text. The RH shown here is identical to that used in Ref. 7.



## References

1. B. Zobrist, V. Soonsin, B. P. Luo, U. K. Krieger, C. Marcolli, T. Peter and T. Koop, Ultra-slow water diffusion in aqueous sucrose glasses, *Phys. Chem. Chem. Phys.*, 2011, **13**, 3514–3526.
2. W. C. Duncan-Hewitt and G. C. Weatherly, Evaluating the hardness, Young’s modulus and fracture toughness of some pharmaceutical crystals using microindentation techniques, *J. Mater. Sci. Lett.*, 1989, **8**, 1350–1352.
3. K. J. Ramos and D. F. Bahr, Mechanical behavior assessment of sucrose using nanoindentation, *J. Mater. Res.*, 2011, **22**, 2037–2045.
4. D. M. Lienhard, A. J. Huisman, U. K. Krieger, Y. Rudich, C. Marcolli, B. P. Luo, D. L. Bones, J. P. Reid, A. T. Lambe, M. R. Canagaratna, P. Davidovits, T. B. Onasch, D. R. Worsnop, S. S. Steimer, T. Koop and T. Peter, Viscous organic aerosol particles in the upper troposphere: diffusivity-controlled water uptake and ice nucleation?, *Atmos. Chem. Phys.*, 2015, **15**, 13599–13613.
5. H. C. Price, J. Mattsson, Y. Zhang, A. K. Bertram, J. F. Davies, J. W. Grayson, S. T. Martin, D. O’Sullivan, J. P. Reid, A. M. J. Rickards and B. J. Murray, Water diffusion in atmospherically relevant  $\alpha$ -pinene secondary organic material, *Chem. Sci.*, 2015, **6**, 4876–4883.
6. P. Jöckel, H. Tost, A. Pozzer, C. Brühl, J. Buchholz, L. Ganzeveld, P. Hoor, A. Kerkweg, M. G. Lawrence, R. Sander, B. Steil, G. Stiller, M. Tanarhte, D. Taraborrelli, J. Van Aardenne and J. Lelieveld, The atmospheric chemistry general circulation model

ECHAM5/MESSy1: Consistent simulation of ozone from the surface to the mesosphere, *Atmos. Chem. Phys.*, 2006, **6**, 5067–5104.

7. M. Shiraiwa, Y. Li, A. P. Tsimpidi, V. A. Karydis, T. Berkemeier, S. N. Pandis, J. Lelieveld, T. Koop and U. Pöschl, Global distribution of particle phase state in atmospheric secondary organic aerosols, *Nat. Commun.*, 2017, **8**, 1–7.
