# Supplementary figures and images for: Equilibration times in viscous and viscoelastic aerosol particles
Source: Royal Society of Chemistry journal article supplement (doi:10.1039/d2ea00065b), 2022-01-01

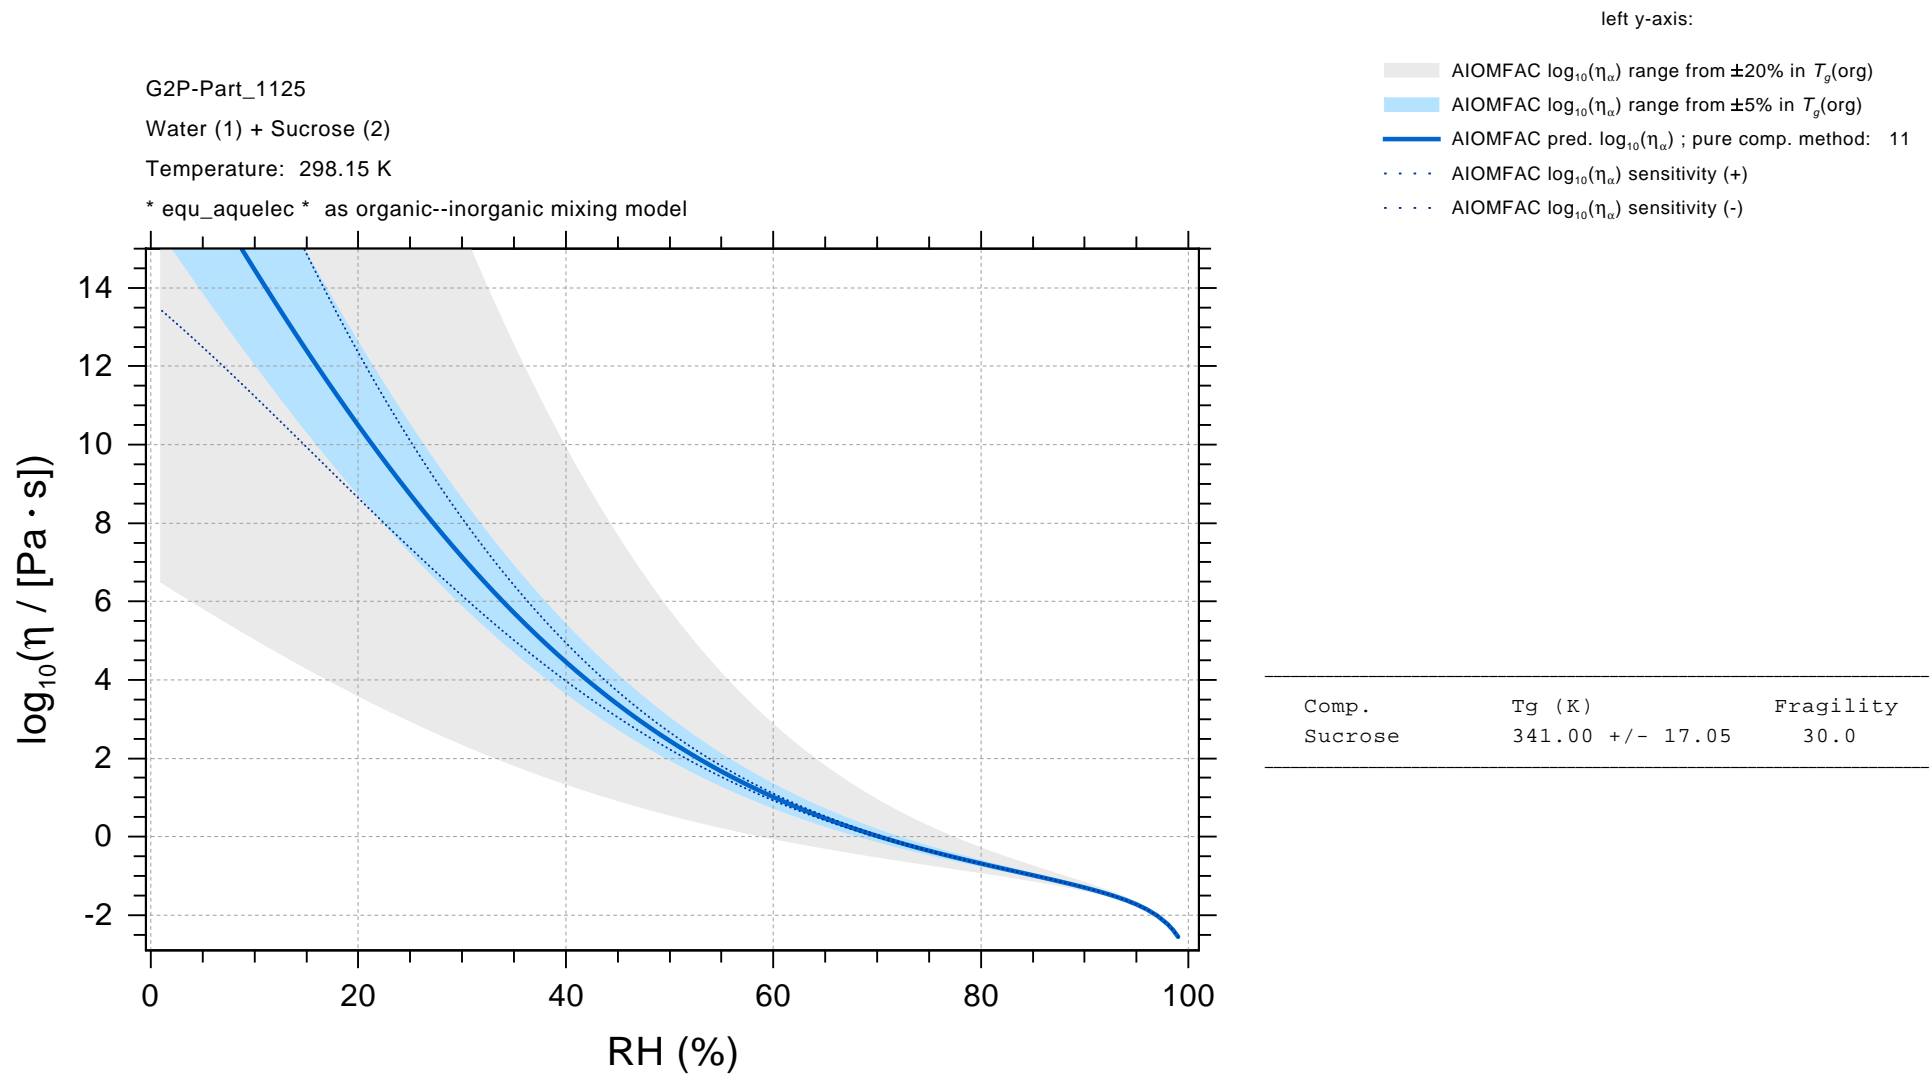

Supplement: d2ea00065b1.zip [file d2ea00065b1.zip]
